# Supplementary material for: Systematic review of economic evaluations investigating education, exercise, and dietary weight management to manage hip and knee osteoarthritis: protocol
Source: Springer Nature journal article supplement (doi:10.1186/s13643-020-01492-6), 2020-10-06
Supplement: MOESM2 [file 18454368]

## Systematic Review Search Criteria

### Medline

1. Economics/
2. Cost/
3. Economics, Nursing/
4. Economics, Medical/
5. Economics, Pharmaceutical/
6. exp Economics, Hospital/
7. exp "Fees and Charges"/
8. exp Budgets/
9. budget\*.ti,ab,kf.
10. (economic\* or cost or costs or costly or costing or price or prices or pricing or pharmacoeconomic\* or pharmaco-economic\* or expenditure or expenditures or expense or expenses or financial or finance or finances or financed).ti,kf.
11. (economic\* or cost or costs or costly or costing or price or prices or pricing or pharmacoeconomic\* or pharmaco-economic\* or expenditure or expenditures or expense or expenses or financial or finance or finances or financed).ab. /freq=2
12. (cost\* adj2 (effective\* or utilit\* or benefit\* or minimi\* or analy\* or outcome or outcomes)).ab,kf.
13. (value adj2 (money or monetary)).ti,ab,kf.
14. or/1-13
15. Hip Osteoarthritis/ or Knee Osteoarthritis/
16. (osteoarthriti\* or osteoarthros\* or arthrit\* or arthros\* or degenerative or joint disorder\* or joint disease\* or knee oa or hip oa) adj3 (knee\* or hip\*)).ti,ab,kf
17. 15 or 16
18. Exercise Therapy/ or Exercise/
19. (physiother\* or exercis\* or therap\* or program\* or structured or targeted or semi structured or supervised or self management).ti,ab,kf.
20. (strength\* or train\* or exercis\* or muscle train\* or muscle strengthening or functional exercise\* or flexibility train\* or perturbation train\* or proprioceptiv\* or motor control or sensorimotor control or functional stability or dynamic stability or quality of movement or agility).ti,ab,kf.

21. exp Patient Education/ or exp Education/ or exp Health Education/ or education.tw,kf.
22. educat\*.ti,ab,kf.
23. exp Diet/ or Weight Loss/ or Diet Therapy/
24. (diet or diet therapy or weight or weight management or weight loss or calor\* or calor\* restriction or body mass).ti,ab,kf.
25. 18 or 19 or 20 or 21 or 22 or 23 or 24
26. 14 and 17 and 25

## Embase

1. Economics/
2. Cost/
3. Exp Health Economics/
4. Budget/
5. budget\*.ti,ab,kw.
6. (economic\* or cost or costs or costly or costing or price or prices or pricing or pharmacoeconomic\* or pharmaco-economic\* or expenditure or expenditures or expense or expenses or financial or finance or finances or financed).ti,kw.
7. (economic\* or cost or costs or costly or costing or price or prices or pricing or pharmacoeconomic\* or pharmaco-economic\* or expenditure or expenditures or expense or expenses or financial or finance or finances or financed).ab. /freq=2
8. (cost\* adj2 (effective\* or utilit\* or benefit\* or minimi\* or analy\* or outcome or outcomes)).ab,kw.
9. (value adj2 (money or monetary)).ti,ab,kw.
10. 1 or 2 or 3 or 4 or 5 or 6 or 7 or 8 or 9
11. Hip Osteoarthritis/ or Knee Osteoarthritis/
12. (osteoarthriti\* or osteoarthros\* or arthrit\* or arthros\* or degenerative or joint disorder\* or joint disease\* or knee oa or hip oa) adj3 (knee\* or hip\*).ti,ab,kw
13. 11 or 12
14. Exercise Therapy/ or Exercise/
15. (physiother\* or exercis\* or therap\* or program\* or structured or targeted or semi structured or supervised or self management).ti,ab,kw.

16. (strength\* or train\* or exercis\* or muscle train\* or muscle strengthening or functional exercise\* or flexibility train\* or perturbation train\* or proprioceptiv\* or motor control or sensorimotor control or functional stability or dynamic stability or quality of movement or agility).ti,ab,kw.
17. exp Patient Education/ or exp Education/ or exp Health Education/ or education.tw,Kw.
18. educat\*.ti,ab,kw.
19. Diet/ or Weight Loss/ or Diet Therapy/
20. (diet or diet therapy or weight or weight management or weight loss or calor\* or calor\* restriction or body mass).ti,ab,kw.
21. 14 or 15 or 16 or 17 or 18 or 19 or 20
22. 10 and 13 and 21

#### Cochrane Central Register of Controlled Trials (CENTRAL)

1. Exp Economics/
2. Economics, Pharmaceutical/ or Economics, Behavioral/ or Economics, Medical/ or Economics/ or Economics, Hospital/ or Economics, Nursing/
3. (Fees and Charges).mp. [mp=title, original title, abstract, mesh headings, heading words, keyword]
4. Budgets/
5. budget\*.ti,tw,kw.
6. (economic\* or cost or costs or costly or costing or price or prices or pricing or pharmaco-economic\* or pharmaco-economic\* or expenditure or expenditures or expense or expenses or financial or finance or finances or financed).ti,ab,kw.
7. (cost\* adj2 (effective\* or utilit\* or benefit\* or minimi\* or analy\* or outcome or outcomes)).ti,ab,kw.
8. (value adj2 (money or monetary)).ti,ab,kw.
9. 1 or 2 or 3 or 4 or 5 or 6 or 7 or 8
10. exp Osteoarthritis/ or exp Osteoarthritis,Hip/ or exp Osteoarthritis,Knee/
11. (osteoarthriti\* or osteoarthros\* or arthrit\* or arthros\* or degenerative or joint disorder\* or joint disease\* or knee oa or hip oa) adj3 (knee\* or hip\*).ti,ab,kw.
12. 10 or 11
13. Exercise Therapy/ or Exercise/

14. (physiother\* or exercis\* or therap\* or program\* or structured or targeted or semi structured or supervised or self management).ti,ab,kw.
15. (strength\* or train\* or exercis\* or muscle train\* or muscle strengthening or functional exercise\* or flexibility train\* or perturbation train\* or proprioceptiv\* or motor control or sensorimotor control or functional stability or dynamic stability or quality of movement or agility).ti,ab,kw.
16. Exp Patient Education as Topic/ or exp Education/ or exp Health Education/ or education.tw,kw.
17. educat\*.ti,ab,kw.
18. Diet/ or Weight Loss/ or Diet Therapy/
19. (diet or diet therapy or weight or weight management or weight loss or calor\* or calor\* restriction or body mass).ti,ab,kw.
20. 13 or 14 or 15 or 16 or 17 or 18 or 19
21. 9 and 12 and 20

#### National Health Services Economic Evaluation Database

22. Economics, Pharmaceutical/ or Economics, Behavioral/ or Economics, Medical/ or Economics/ or Economics, Hospital/ or Economics, Nursing/
23. (Fees and Charges).mp. [mp=title,text, subject heading word]
24. Budgets/
25. budget\*.ti,tw,sh.
26. (economic\* or cost or costs or costly or costing or price or prices or pricing or pharmaco-economic\* or pharmaco-economic\* or expenditure or expenditures or expense or expenses or financial or finance or finances or financed) .ti,tw,sh.
27. (cost\* adj2 (effective\* or utilit\* or benefit\* or minimi\* or analy\* or outcome or outcomes)) .ti,tw,sh.
28. (value adj2 (money or monetary)) .ti,tw,sh.
29. 1 or 2 or 3 or 4 or 5 or 6 or 7
30. exp Osteoarthritis/ or exp Osteoarthritis,Hip/ or exp Osteoarthritis,Knee/
31. (osteoarthriti\* or osteoarthros\* or arthrit\* or arthros\* or degenerative or joint disorder\* or joint disease\* or knee oa or hip oa) adj3 (knee\* or hip\*). .ti,tw,sh.
32. 9 or 10

- 33. Exercise Therapy/ or Exercise/
- 34. (physiother\* or exercis\* or therap\* or program\* or structured or targeted or semi structured or supervised or self management).ti,tw,sh.
- 35. (strength\* or train\* or exercis\* or muscle train\* or muscle strengthening or functional exercise\* or flexibility train\* or perturbation train\* or proprioceptiv\* or motor control or sensorimotor control or functional stability or dynamic stability or quality of movement or agility) .ti,tw,sh.
- 36. exp Education/ or exp Health Education/ or education.tw,sh.
- 37. educat\* .ti,tw,sh.
- 38. Diet/ or Weight Loss/ or Diet Therapy/
- 39. (diet or diet therapy or weight or weight management or weight loss or calor\* or calor\* restriction or body mass).ti,tw,sh.
- 40. 12 or 13 or 14 or 15 or 16 or 17 or 18
- 41. 8 and 11 and 19

EconLit

| #   | Query                                                                                          | Limiters/Expanders                      | Last Run Via                                                                                   |
|-----|------------------------------------------------------------------------------------------------|-----------------------------------------|------------------------------------------------------------------------------------------------|
| S39 | (S17 AND S23 AND S38)                                                                          | Search modes - Find all my search terms | Interface - EBSCOhost Research Databases<br>Search Screen - Advanced Search Database - EconLit |
| S38 | S24 OR S25 OR S26 OR S27 OR S28 OR S29 OR S30 OR S31 OR S32 OR S33 OR S34 OR S35 OR S36 OR S37 | Search modes - Find all my search terms | Interface - EBSCOhost Research Databases<br>Search Screen - Advanced Search Database - EconLit |

|     |                                                                                                                      |                                         |                                                                                                |
|-----|----------------------------------------------------------------------------------------------------------------------|-----------------------------------------|------------------------------------------------------------------------------------------------|
| S37 | AB (diet or diet therapy or weight or weight management or weight loss or calor* or calor* restriction or body mass) | Search modes - Find all my search terms | Interface - EBSCOhost Research Databases<br>Search Screen - Advanced Search Database - EconLit |
| S36 | TI (diet or diet therapy or weight or weight management or weight loss or calor* or calor* restriction or body mass) | Search modes - Find all my search terms | Interface - EBSCOhost Research Databases<br>Search Screen - Advanced Search Database - EconLit |
| S35 | MH Caloric Restriction                                                                                               | Search modes - Find all my search terms | Interface - EBSCOhost Research Databases<br>Search Screen - Advanced Search Database - EconLit |
| S34 | MH (diet therapy or dietetic therapy or diet or nutrition interventions)                                             | Search modes - Find all my search terms | Interface - EBSCOhost Research Databases<br>Search Screen - Advanced Search Database - EconLit |
| S33 | MH (weight loss or weight reduction or lose weight or obesity or overweight or weight management)                    | Search modes - Find all my search terms | Interface - EBSCOhost Research Databases<br>Search Screen - Advanced Search Database - EconLit |
| S32 | MH (diet or nutrition or food habit or eating habit or lifestyle)                                                    | Search modes - Find all my search terms | Interface - EBSCOhost Research Databases                                                       |

|     |                                                                                                                                                                                                                                                                                              |                                         |                                                                                                |
|-----|----------------------------------------------------------------------------------------------------------------------------------------------------------------------------------------------------------------------------------------------------------------------------------------------|-----------------------------------------|------------------------------------------------------------------------------------------------|
|     |                                                                                                                                                                                                                                                                                              |                                         | Search Screen - Advanced Search Database - EconLit                                             |
| S31 | AB (educat*)                                                                                                                                                                                                                                                                                 | Search modes - Find all my search terms | Interface - EBSCOhost Research Databases<br>Search Screen - Advanced Search Database - EconLit |
| S30 | TI (educat*)                                                                                                                                                                                                                                                                                 | Search modes - Find all my search terms | Interface - EBSCOhost Research Databases<br>Search Screen - Advanced Search Database - EconLit |
| S29 | MH (Patient Education or Education or Health Education)                                                                                                                                                                                                                                      | Search modes - Find all my search terms | Interface - EBSCOhost Research Databases<br>Search Screen - Advanced Search Database - EconLit |
| S28 | AB (strength* or train* or exercis* or muscle train* or muscle strengthening or functional exercise* or flexibility train* or perturbation train* or proprioceptiv* or motor control or sensorimotor control or functional stability or dynamic stability or quality of movement or agility) | Search modes - Find all my search terms | Interface - EBSCOhost Research Databases<br>Search Screen - Advanced Search Database - EconLit |
| S27 | TI (strength* or train* or exercis* or muscle train* or muscle strengthening or functional exercise* or flexibility train* or perturbation train* or proprioceptiv* or motor                                                                                                                 | Search modes - Find all my search terms | Interface - EBSCOhost Research Databases<br>Search Screen - Advanced Search Database - EconLit |

|     |                                                                                                                                        |                                         |                                                                                                |
|-----|----------------------------------------------------------------------------------------------------------------------------------------|-----------------------------------------|------------------------------------------------------------------------------------------------|
|     | control or sensorimotor control or functional stability or dynamic stability or quality of movement or agility)                        |                                         |                                                                                                |
| S26 | AB (physiother* or exercis* or therap* or program* or structured or targeted or semi structured or supervised or self management)      | Search modes - Find all my search terms | Interface - EBSCOhost Research Databases<br>Search Screen - Advanced Search Database - EconLit |
| S25 | TI (physiother* or exercis* or therap* or program* or structured or targeted or semi structured or supervised or self management)      | Search modes - Find all my search terms | Interface - EBSCOhost Research Databases<br>Search Screen - Advanced Search Database - EconLit |
| S24 | MH (Exercise Therapy OR Exercise)                                                                                                      | Search modes - Find all my search terms | Interface - EBSCOhost Research Databases<br>Search Screen - Advanced Search Database - EconLit |
| S23 | S18 OR S19 OR S20 OR S21 OR S22                                                                                                        | Search modes - Find all my search terms | Interface - EBSCOhost Research Databases<br>Search Screen - Advanced Search Database - EconLit |
| S22 | AB (osteoarthriti* or osteoarthros* or arthrit* or arthros* or degenerative or joint disorder* or joint disease* or knee oa or hip oa) | Search modes - Find all my search terms | Interface - EBSCOhost Research Databases<br>Search Screen - Advanced Search Database - EconLit |



|     |                                                                                                                                        |                                         |                                                                                                |
|-----|----------------------------------------------------------------------------------------------------------------------------------------|-----------------------------------------|------------------------------------------------------------------------------------------------|
| S21 | TI (osteoarthriti* or osteoarthros* or arthrit* or arthros* or degenerative or joint disorder* or joint disease* or knee oa or hip oa) | Search modes - Find all my search terms | Interface - EBSCOhost Research Databases<br>Search Screen - Advanced Search Database - EconLit |
| S20 | MH (Osteoarthritis, Knee)                                                                                                              | Search modes - Find all my search terms | Interface - EBSCOhost Research Databases<br>Search Screen - Advanced Search Database - EconLit |
| S19 | MH (Osteoarthritis, Hip)                                                                                                               | Search modes - Find all my search terms | Interface - EBSCOhost Research Databases<br>Search Screen - Advanced Search Database - EconLit |
| S18 | MH (Osteoarthritis)                                                                                                                    | Search modes - Find all my search terms | Interface - EBSCOhost Research Databases<br>Search Screen - Advanced Search Database - EconLit |
| S17 | S1 OR S2 OR S3 OR S4 OR S5 OR S6 OR S7 OR S8 OR S9 OR S10 OR S11 OR S12 OR S13 OR S14 OR S15 OR S16                                    | Search modes - Find all my search terms | Interface - EBSCOhost Research Databases<br>Search Screen - Advanced Search Database - EconLit |
| S16 | AB (value money or value monetary)                                                                                                     | Search modes - Find all my search terms | Interface - EBSCOhost Research Databases                                                       |

|     |                                                                                                                                                                                                                                              |                                         |                                                                                                |
|-----|----------------------------------------------------------------------------------------------------------------------------------------------------------------------------------------------------------------------------------------------|-----------------------------------------|------------------------------------------------------------------------------------------------|
|     |                                                                                                                                                                                                                                              |                                         | Search Screen - Advanced Search Database - EconLit                                             |
| S15 | TI (value money or value monetary)                                                                                                                                                                                                           | Search modes - Find all my search terms | Interface - EBSCOhost Research Databases<br>Search Screen - Advanced Search Database - EconLit |
| S14 | AB (cost* effective* or cost* utilit* or cost* benefit* or cost* minimi* or cost* analy* or cost* outcome or cost* outcomes)                                                                                                                 | Search modes - Find all my search terms | Interface - EBSCOhost Research Databases<br>Search Screen - Advanced Search Database - EconLit |
| S13 | TI (cost* effective* or cost* utilit* or cost* benefit* or cost* minimi* or cost* analy* or cost* outcome or cost* outcomes)                                                                                                                 | Search modes - Find all my search terms | Interface - EBSCOhost Research Databases<br>Search Screen - Advanced Search Database - EconLit |
| S12 | (economic* or cost or costs or costly or costing or price or prices or pricing or pharmacoeconomic* or pharmaco-economic* or expenditure or expenditures or expense or expenses or financial or finance or finances or financed).ab. /freq=2 | Search modes - SmartText Searching      | Interface - EBSCOhost Research Databases<br>Search Screen - Advanced Search Database - EconLit |
| S11 | TI (economic* or cost or costs or costly or costing or price or prices or pricing or pharmacoeconomic* or pharmaco-economic* or expenditure or expenditures or expense or                                                                    | Search modes - Find all my search terms | Interface - EBSCOhost Research Databases<br>Search Screen - Advanced Search Database - EconLit |

|     |                                                                                                                                                                                                                                     |                                         |                                                                                                |
|-----|-------------------------------------------------------------------------------------------------------------------------------------------------------------------------------------------------------------------------------------|-----------------------------------------|------------------------------------------------------------------------------------------------|
|     | expenses or financial or finance or finances or financed).ab. /freq=2                                                                                                                                                               |                                         |                                                                                                |
| S10 | AB (economic* or cost or costs or costly or costing or price or prices or pricing or pharmacoeconomic* or pharmaco-economic* or expenditure or expenditures or expense or expenses or financial or finance or finances or financed) | Search modes - Find all my search terms | Interface - EBSCOhost Research Databases<br>Search Screen - Advanced Search Database - EconLit |
| S9  | TI (economic* or cost or costs or costly or costing or price or prices or pricing or pharmacoeconomic* or pharmaco-economic* or expenditure or expenditures or expense or expenses or financial or finance or finances or financed) | Search modes - Find all my search terms | Interface - EBSCOhost Research Databases<br>Search Screen - Advanced Search Database - EconLit |
| S8  | MH (Budgets)                                                                                                                                                                                                                        | Search modes - Find all my search terms | Interface - EBSCOhost Research Databases<br>Search Screen - Advanced Search Database - EconLit |
| S7  | MH Fees and Charges                                                                                                                                                                                                                 | Search modes - Find all my search terms | Interface - EBSCOhost Research Databases<br>Search Screen - Advanced Search Database - EconLit |
| S6  | MH Economics, Hospital                                                                                                                                                                                                              | Search modes - Find all my search terms | Interface - EBSCOhost Research Databases<br>Search Screen - Advanced Search Database - EconLit |

|    |                              |                                         |                                                                                                |
|----|------------------------------|-----------------------------------------|------------------------------------------------------------------------------------------------|
| S5 | MH Economics, Pharmaceutical | Search modes - Find all my search terms | Interface - EBSCOhost Research Databases<br>Search Screen - Advanced Search Database - EconLit |
| S4 | MH Economics, Medical        | Search modes - Find all my search terms | Interface - EBSCOhost Research Databases<br>Search Screen - Advanced Search Database - EconLit |
| S3 | MH Economics, Nursing        | Search modes - Find all my search terms | Interface - EBSCOhost Research Databases<br>Search Screen - Advanced Search Database - EconLit |
| S2 | MH Costs and Cost Analysis   | Search modes - Find all my search terms | Interface - EBSCOhost Research Databases<br>Search Screen - Advanced Search Database - EconLit |
| S1 | MH economics                 | Search modes - Find all my search terms | Interface - EBSCOhost Research Databases<br>Search Screen - Advanced Search Database - EconLit |
